# Supplementary material for: Origin and adaptation of green‐sensitive (RH2) pigments in vertebrates
Source: PubMed Central journal article supplement (PMC7193153; doi:10.1002/2211-5463.12843), 2020-04-11
Supplement: FEB4-10-873-s001.pdf [file FEB4-10-873-s001.pdf]

Supporting information for

**Origin and adaptive evolution of green-sensitive (RH2) pigments in vertebrates**

Shozo Yokoyama and Huiyong Jia

Shozo Yokoyama

Email: syokoya@emory.edu

**Contents:**

**Tables S1 to S3**

**Figs. S1 to S3**

**Table S1.** The source of RH2 pigment sequences.

| Pigment                               | Species                          | GenBank      |
|---------------------------------------|----------------------------------|--------------|
| lamprey (P492) <sup>†</sup>           | <i>Geotria australis</i>         | AY366494     |
| shark-Cmil                            | <i>Callorhinchus milii</i>       | EF565168     |
| eel (P506) <sup>†</sup>               | <i>Anguilla anguilla</i>         | FJ515778     |
| zebrafish 1 (P467) <sup>†</sup>       | <i>Danio rerio</i>               | AB087805     |
| zebrafish 2 (P478) <sup>†</sup>       | <i>Danio rerio</i>               | AB087806     |
| zebrafish 3 (P488) <sup>†</sup>       | <i>Danio rerio</i>               | AB087807     |
| zebrafish 4 (P505) <sup>†</sup>       | <i>Danio rerio</i>               | AB087808     |
| goldfish 1 (P511) <sup>†</sup>        | <i>Carassius auratus auratus</i> | L11865       |
| goldfish 2 (P506) <sup>†</sup>        | <i>Carassius auratus auratus</i> | L11866       |
| loosejaw (P468) <sup>†</sup>          | <i>Aristostomias scintillans</i> | KT933073     |
| medaka A (P452) <sup>†</sup>          | <i>Oryzias latipes</i>           | AB223053     |
| medaka B (P516) <sup>†</sup>          | <i>Oryzias latipes</i>           | AB223054     |
| medaka C (P492) <sup>†</sup>          | <i>Oryzias latipes</i>           | AB223055     |
| tilapiaA $\alpha$ (P528) <sup>†</sup> | <i>Oreochromis niloticus</i>     | DQ235683     |
| tilapiaA $\beta$ (P518) <sup>†</sup>  | <i>Oreochromis niloticus</i>     | DQ235682     |
| tilapiaB (P472) <sup>†</sup>          | <i>Oreochromis niloticus</i>     | DQ235681     |
| bfin killifish (P530) <sup>†</sup>    | <i>Lucania goodei</i>            | AY296739     |
| scabbardfish A (P496) <sup>†</sup>    | <i>Lepidopus fitchi</i>          | GQ414752     |
| scabbardfish C (P506) <sup>†</sup>    | <i>Lepidopus fitchi</i>          | GQ421594     |
| coelacanth (P478) <sup>†</sup>        | <i>Latimeria chalumnae</i>       | AH007713     |
| lungfish                              | <i>Neoceratodus forsteri</i>     | EF526296     |
| chameleon (P495) <sup>†</sup>         | <i>Anolis carolinensis</i>       | AF134189     |
| lizard-Usta                           | <i>Uta stansburiana</i>          | DQ100324     |
| Italian lizard                        | <i>Podarcis sicula</i>           | AY941829     |
| gecko (P467) <sup>†</sup>             | <i>Gekko gekko</i>               | M92035       |
| turtle-Cpic                           | <i>Chrysemys picta bellii</i>    | XM_005309675 |
| turtle-Psin                           | <i>Pelodiscus sinensis</i>       | XM_006119345 |
| chicken (P505) <sup>†</sup>           | <i>Gallus gallus</i>             | M92038       |
| hummingbird                           | <i>Calypte anna</i>              | XM_008499430 |
| pigeon (P503) <sup>†</sup>            | <i>Columba livia</i>             | AF149232     |
| bald eagle                            | <i>Haliaeetus leucocephalus</i>  | XM_010584680 |
| cormorant                             | <i>Phalacrocorax carbo</i>       | XM_009505908 |
| bee-eater                             | <i>Merops nubicus</i>            | XM_008939766 |
| budgerigar                            | <i>Melopsittacus undulatus</i>   | XM_005142831 |
| goldcrest                             | <i>Regulus regulus</i>           | KM977595     |
| zebra finch (P508) <sup>†</sup>       | <i>Taeniopygia guttata</i>       | AF222330     |
| lamprey RH1                           | <i>Geotria australis</i>         | U67123       |
| bovine RH1                            | <i>Bos taurus</i>                | M21606       |
| lamprey SWS1                          | <i>Geotria australis</i>         | AY366495     |
| lamprey SWS2                          | <i>Geotria australis</i>         | AY366492     |

<sup>†</sup> 24 RH2 pigments with known  $\lambda_{\max S}$ .

The numbers after P in parentheses are  $\lambda_{\max S}$ .

**Table S2.** Amino acids of AncAgnatha with PP <0.95 (in parentheses) inferred using PAML with JTT model.

| Site | 24 pigments |          | 37 pigments |          | Site | 24 pigments |          | 37 pigments |          |
|------|-------------|----------|-------------|----------|------|-------------|----------|-------------|----------|
| 36*  | K (0.93)    | Q (0.04) | K (0.67)    | M (0.17) | 173* | F (0.92)    | V (0.07) | V (0.97)    | F (0.03) |
| 37   | Y (0.57)    | F (0.43) | Y (0.90)    | F (0.10) | 197  | K (0.87)    | N (0.09) | K (0.65)    | N (0.23) |
| 39*  | A (0.74)    | V (0.24) | V (0.74)    | I (0.09) | 199* | H (0.79)    | N (0.16) | N (0.88)    | H (0.11) |
| 41*  | A (0.83)    | S (0.16) | S (0.67)    | A (0.33) | 205  | I (0.55)    | M (0.42) | I (0.90)    | M (0.10) |
| 50*  | I (0.46)    | V (0.40) | V (0.55)    | I (0.23) | 207  | M (0.91)    | L (0.09) | M (0.80)    | L (0.20) |
| 54   | I (0.63)    | V (0.37) | I (0.64)    | V (0.35) | 214* | L (0.83)    | I (0.11) | I (0.98)    | L (0.02) |
| 83   | D (0.90)    | N (0.10) | D (0.85)    | N (0.15) | 222* | T (0.89)    | S (0.11) | S (0.96)    | T (0.04) |
| 85   | F (0.93)    | I (0.05) | F (0.80)    | I (0.12) | 256  | I (0.62)    | L (0.37) | I (0.61)    | L (0.38) |
| 88*  | C (0.41)    | L (0.32) | M (0.88)    | L (0.10) | 259  | I (0.53)    | V (0.42) | I (0.94)    | V (0.06) |
| 93*  | V (0.78)    | T (0.21) | T (0.60)    | L (0.26) | 271  | V (0.85)    | F (0.09) | V (0.77)    | F (0.20) |
| 98   | A (0.85)    | S (0.15) | A (0.83)    | S (0.16) | 279* | K (0.94)    | R (0.06) | K (0.81)    | Q (0.18) |
| 111  | N (0.45)    | S (0.29) | N (0.98)    | S (0.01) | 281* | A (0.50)    | S (0.43) | S (0.59)    | A (0.36) |
| 122  | E (0.78)    | Q (0.22) | E (0.87)    | Q (0.13) | 282  | D (0.94)    | E (0.04) | D (0.75)    | E (0.18) |
| 124* | A (0.96)    | S (0.04) | S (0.79)    | A (0.21) | 284* | S (0.52)    | T (0.34) | S (0.97)    | G (0.03) |
| 139  | V (0.94)    | I (0.06) | V (0.76)    | I (0.24) | 287  | L (0.53)    | F (0.30) | L (0.59)    | F (0.40) |
| 149* | A (0.65)    | S (0.21) | G (0.94)    | S (0.04) | 299* | A (0.95)    | S (0.03) | A (0.94)    | V (0.06) |
| 150  | S (0.92)    | N (0.04) | S (0.94)    | N (0.06) | 304  | I (0.92)    | V (0.08) | I (1.0)     | -        |
| 154  | I (0.96)    | L (0.02) | I (0.88)    | L (0.10) | 307  | V (0.92)    | I (0.08) | V (0.51)    | I (0.49) |
| 157  | V (0.90)    | I (0.10) | V (0.95)    | I (0.05) | 309* | L (0.58)    | M (0.42) | M (1.0)     | -        |
| 162* | I (0.62)    | V (0.38) | V (0.94)    | I (0.06) |      |             |          |             |          |

\*The amino acids inferred based on 24 and 37 data sets differ.

**Table S3.** Amino acids of ancestral pigments at three critical sites with PP (in parentheses) inferred using PAML with JTT substitution model.

| Pigment           | Data set | Amino acid sites |          |          |          |          |          |
|-------------------|----------|------------------|----------|----------|----------|----------|----------|
|                   |          | 122              |          | 207      |          | 292      |          |
| 1. AncAgnatha     | 24       | E (0.78)         | Q (0.22) | M (0.91) | L (0.09) | A (1.0)  | -        |
|                   | 37       | E (0.87)         | Q (0.13) | M (0.80) | L (0.20) | A (1.0)  | -        |
| 2. AncJawedfish   | 24       | Q (0.86)         | E (0.14) | M (0.97) | L (0.03) | A (1.0)  | -        |
|                   | 37       | Q (0.95)         | E (0.05) | M (0.82) | L (0.18) | A (1.0)  | -        |
| 3. AncTeleost     | 24       | Q (0.84)         | E (0.16) | M (1.0)  | -        | A (1.0)  | -        |
|                   | 37       | Q (0.96)         | E (0.04) | M (1.0)  | -        | A (1.0)  | -        |
| 4. AncClupeo      | 24       | Q (0.89)         | E (0.11) | M (1.0)  | -        | A (1.0)  | -        |
|                   | 37       | Q (0.97)         | E (0.03) | M (1.0)  | -        | A (1.0)  | -        |
| 5. AncCyprini1    | 24       | Q (0.89)         | E (0.11) | M (1.0)  | -        | A (1.0)  | -        |
|                   | 37       | Q (0.97)         | E (0.03) | M (1.0)  | -        | A (1.0)  | -        |
| 6. AncCyprini2    | 24       | E (0.75)         | Q (0.25) | M (1.0)  | -        | A (1.0)  | -        |
|                   | 37       | E (0.76)         | Q (0.24) | M (1.0)  | -        | A (1.0)  | -        |
| 7. AncEuteleost1  | 24       | Q (0.97)         | E (0.03) | M (1.0)  | -        | A (1.0)  | -        |
|                   | 37       | Q (1.0)          | -        | M (1.0)  | -        | A (1.0)  | -        |
| 8. AncEuteleost2  | 24       | Q (0.97)         | E (0.03) | M (1.0)  | -        | A (0.96) | S (0.04) |
|                   | 37       | Q (1.0)          | -        | M (1.0)  | -        | A (0.96) | S (0.04) |
| 9. AncEuteleost3  | 24       | Q (1.0)          | -        | M (1.0)  | -        | S (0.98) | A (0.02) |
|                   | 37       | Q (1.0)          | -        | M (1.0)  | -        | S (0.97) | A (0.03) |
| 10. AncEuteleost4 | 24       | E (1.0)          | -        | M (1.0)  | -        | A (1.0)  | -        |
|                   | 37       | E (1.0)          | -        | M (1.0)  | -        | A (1.0)  | -        |
| 11. AncTetrapod   | 24       | Q (0.99)         | E (0.01) | M (0.97) | L (0.03) | A (1.0)  | -        |
|                   | 37       | Q (0.98)         | E (0.02) | M (1.0)  | -        | A (1.0)  | -        |
| 12. AncSauropsid  | 24       | Q (1.0)          | -        | M (1.0)  | -        | A (1.0)  | -        |
|                   | 37       | Q (1.0)          | -        | M (1.0)  | -        | A (1.0)  | -        |
| 13. AncReptile    | 24       | Q (1.0)          | -        | M (1.0)  | -        | A (1.0)  | -        |
|                   | 37       | Q (1.0)          | -        | M (1.0)  | -        | A (1.0)  | -        |

**Fig. S1**

(A)

|                   | 40   | 50 | 60 | 70 | 80 | 90 |   |   |   |   |   |   |   |   |   |   |   |   |   |   |   |   |   |   |   |   |   |   |   |   |   |   |   |   |   |   |   |   |   |   |   |   |   |   |   |   |   |   |   |   |   |   |   |   |   |   |   |
|-------------------|------|----|----|----|----|----|---|---|---|---|---|---|---|---|---|---|---|---|---|---|---|---|---|---|---|---|---|---|---|---|---|---|---|---|---|---|---|---|---|---|---|---|---|---|---|---|---|---|---|---|---|---|---|---|---|---|---|
| lamprey (P492)    | LADP | W  | M  | S  | A  | I  | S | A | Y | V | F | T | L | I | L | I | G | F | P | V | N | F | M | T | L | F | V | T | F | K | L | K | L | R | Q | P | L | N | F | I | L | V | N | L | C | V | A | D | L | L | M | I | M | F | G |   |   |
| shark-Cmil        | LADR | W  | L  | F  | S  | S  | I | S | A | Y | M | F | L | L | I | C | A | G | L | P | I | N | G | L | T | L | L | V | T | V | K | H | K | L | R | Q | P | L | N | Y | I | L | V | N | L | A | V | A | N | L | V | M | I | M | F | G |   |
| eel (P506)        | LGE  | P  | W  | Q  | Y  | K  | M | L | A | V | Y | V | F | F | L | I | C | F | G | F | P | I | N | G | L | T | L | V | V | T | A | Q | H | K | L | R | Q | P | L | N | F | I | L | V | N | L | A | V | A | G | L | I | M | C | I | F | G |
| goldfish1 (P511)  | LAEP | W  | Q  | F  | K  | L  | L | A | V | Y | M | F | F | L | I | C | L | G | L | P | I | N | G | L | T | L | L | V | T | A | Q | H | K | L | R | Q | P | L | N | F | I | L | V | N | L | A | V | A | G | T | I | M | V | C | F | G |   |
| goldfish2 (P506)  | LAEP | W  | Q  | F  | K  | L  | L | A | V | Y | M | F | F | L | I | C | L | G | L | P | I | N | G | L | T | L | L | V | T | A | Q | H | K | L | R | Q | P | L | N | F | I | L | V | N | L | A | V | A | G | A | I | M | V | C | F | G |   |
| zebrafish1 (P467) | LAEP | W  | K  | F  | K  | A  | L | A | F | Y | M | F | L | L | I | I | F | G | F | P | I | N | V | L | T | L | V | V | T | A | Q | H | K | L | R | Q | P | L | N | Y | I | L | V | N | L | A | F | A | G | T | I | M | V | I | F | G |   |
| zebrafish2 (P478) | LADP | W  | Q  | F  | K  | A  | L | A | F | Y | M | F | F | L | I | C | F | G | L | P | I | N | V | L | T | L | L | V | T | A | Q | H | K | L | R | Q | P | L | N | Y | I | L | V | N | L | A | F | A | G | T | I | M | A | F | F | G |   |
| zebrafish3 (P488) | LAEP | W  | Q  | F  | K  | L  | L | A | V | Y | M | F | F | L | I | M | C | F | G | F | P | I | N | G | L | T | L | V | V | T | A | Q | H | K | L | R | Q | P | L | N | F | I | L | V | N | L | A | V | A | G | T | I | M | V | C | F | G |
| zebrafish4 (P505) | LAEP | W  | Q  | F  | K  | L  | L | A | V | Y | M | F | F | L | I | C | L | G | F | P | I | N | G | L | T | L | L | V | T | A | Q | H | K | L | R | Q | P | L | N | F | I | L | V | N | L | A | V | A | G | T | I | M | V | C | F | G |   |
| medakaA (P452)    | LADP | W  | Q  | F  | K  | L  | L | G | I | Y | M | F | F | L | I | L | T | G | F | P | I | N | A | L | T | L | V | V | T | A | Q | N | K | L | R | Q | P | L | N | F | I | L | V | N | L | A | V | A | G | L | I | M | V | C | F | G |   |
| medakaB (P516)    | MVDP | I  | M  | Y  | K  | I  | L | A | F | Y | M | F | F | L | I | C | T | G | T | P | I | N | G | L | T | L | Y | V | T | A | T | N | K | L | Q | Q | P | L | N | F | I | L | V | N | L | A | V | A | G | L | I | M | C | A | F | G |   |
| medakaC (P492)    | MVDP | I  | M  | Y  | K  | I  | L | A | F | Y | M | F | F | L | I | C | T | G | T | P | I | N | G | L | T | L | Y | V | T | A | T | N | K | L | Q | Q | P | L | N | F | I | L | V | N | L | A | V | A | G | L | I | M | C | A | F | G |   |
| Bkillifish (P530) | MVDP | M  | I  | Y  | K  | V  | L | A | F | Y | M | F | F | L | I | C | T | G | T | P | I | N | G | L | T | L | F | V | T | A | Q | N | K | L | R | Q | P | L | N | Y | I | L | V | N | L | A | V | A | G | L | I | M | C | C | F | G |   |
| tilapiaAa (P528)  | MVDP | I  | T  | Y  | K  | I  | L | A | F | Y | M | F | F | L | I | C | T | G | T | P | I | N | G | L | T | L | F | V | T | A | Q | N | K | L | R | Q | P | L | N | Y | I | L | V | N | L | A | V | A | G | L | I | M | C | C | F | G |   |
| tilapiaAb (P518)  | LADP | I  | F  | F  | K  | L  | L | A | F | Y | M | F | F | L | I | C | T | G | T | P | I | N | G | L | T | L | F | V | T | A | Q | N | K | L | R | Q | P | L | N | Y | I | L | V | N | L | A | V | A | G | L | I | M | C | C | F | G |   |
| tilapiaB (P472)   | LADP | W  | F  | F  | K  | L  | L | A | F | Y | M | V | F | L | I | V | T | G | F | P | I | N | F | L | T | L | L | V | T | A | Q | N | K | L | R | Q | P | L | N | F | I | L | V | N | L | A | V | A | G | L | I | M | V | M | F | G |   |
| scabbardA (P496)  | LGAP | W  | Q  | F  | K  | L  | L | A | L | Y | M | F | F | L | I | S | F | G | F | P | I | N | A | L | T | L | V | V | T | A | Q | H | K | L | R | Q | P | L | N | F | I | L | V | N | L | A | V | A | G | L | V | M | V | C | F | G |   |
| scabbardC (P506)  | FGAP | W  | Q  | F  | K  | L  | L | A | L | Y | M | F | F | L | I | S | F | G | F | P | I | N | A | L | T | L | V | V | T | A | Q | H | K | L | R | Q | P | L | N | F | I | L | V | N | L | A | V | A | G | L | V | M | V | C | F | G |   |
| loosejaw          | LGPP | W  | Q  | F  | Y  | A  | L | A | A | Y | M | F | M | L | I | C | F | G | L | P | I | N | V | L | T | L | L | V | T | A | Q | N | K | L | R | Q | P | L | N | F | I | L | V | N | L | A | V | A | G | T | I | M | V | V | F | G |   |
| lungfish          | LADP | W  | K  | Y  | S  | I  | V | C | A | Y | M | F | F | L | I | I | T | G | L | P | I | N | L | L | T | L | V | V | T | F | K | H | K | L | R | Q | P | L | N | Y | I | L | V | N | L | A | V | A | D | L | F | M | V | C | F | G |   |
| coelacanth (P478) | LAEP | W  | K  | F  | S  | V  | L | C | A | Y | M | F | L | L | I | I | L | G | F | P | I | N | F | L | T | L | L | V | T | F | K | H | K | L | R | Q | P | L | N | Y | I | L | V | N | L | A | V | A | S | L | F | M | V | V | F | G |   |
| chameleon (P495)  | LAEP | W  | K  | Y  | K  | V  | V | C | C | Y | I | F | F | L | I | F | T | G | L | P | I | N | I | L | T | L | L | V | T | F | K | H | K | L | R | Q | P | L | N | Y | I | L | V | N | L | A | V | A | D | L | F | M | A | C | F | G |   |
| gecko (P467)      | LADP | W  | K  | F  | K  | V  | L | S | F | Y | M | F | F | L | I | A | A | G | M | P | L | N | G | L | T | L | F | V | T | F | Q | H | K | L | R | Q | P | L | N | Y | I | L | V | N | L | A | A | A | N | L | V | T | V | C | C | G |   |
| geckoPmad         | LAEP | W  | K  | F  | K  | A  | L | S | L | Y | M | F | F | L | I | L | V | G | L | P | I | N | G | L | T | L | F | V | T | F | Q | H | K | L | R | Q | P | L | N | Y | I | L | V | N | L | A | V | A | N | L | L | M | V | I | C | G |   |
| lizardUsta        | LAEP | W  | K  | Y  | K  | I  | V | C | C | Y | I | F | F | L | I | S | T | G | L | P | I | N | I | L | T | L | L | V | T | F | K | H | K | L | R | Q | P | L | N | Y | I | L | V | N | L | A | V | A | D | L | F | M | A | C | F | G |   |
| pigeon (P503)     | LAEP | W  | K  | Y  | R  | V  | V | C | C | Y | I | F | F | L | I | S | T | G | L | P | I | N | L | L | T | L | L | V | T | F | K | H | K | L | R | Q | P | L | N | Y | I | L | V | N | L | A | V | A | D | L | F | M | A | C | F | G |   |
| zebrafinch (P508) | LAEP | W  | K  | Y  | R  | L  | V | C | C | Y | I | F | F | L | I | S | T | G | F | P | I | N | F | L | T | L | L | V | T | F | K | H | K | L | R | Q | P | L | N | Y | I | L | V | N | L | A | V | A | D | L | C | M | A | C | F | G |   |
| chicken (P505)    | LAEP | W  | K  | Y  | R  | L  | V | C | C | Y | I | F | F | L | I | S | T | G | L | P | I | N | L | L | T | L | L | V | T | F | K | H | K | L | R | Q | P | L | N | Y | I | L | V | N | L | A | V | A | D | L | F | M | A | C | F | G |   |
| budgeriger        | LAEP | W  | K  | Y  | R  | V  | V | C | C | Y | I | F | F | L | I | S | T | G | L | P | I | N | L | L | T | L | L | V | T | F | K | H | K | L | R | Q | P | L | N | Y | I | L | V | N | L | A | V | A | D | L | F | M | A | C | F | G |   |
| Ital lizard       | LAEP | W  | K  | Y  | K  | M  | V | C | C | Y | I | F | F | L | I | S | T | G | L | P | I | N | L | L | T | L | L | V | T | F | K | H | K | L | R | Q | P | L | N | Y | I | L | V | N | L | A | V | A | D | L | F | M | A | C | F | G |   |
| bald eagle        | LAEP | W  | K  | Y  | R  | V  | V | C | C | Y | I | F | F | L | I | S | T | G | L | P | I | N | L | L | T | L | L | V | T | F | K | H | K | L | R | Q | P | L | N | Y | I | L | V | N | L | A | V | A | D | L | F | M | A | C | F | G |   |
| bee-eater         | LAEP | W  | K  | Y  | R  | L  | V | C | C | Y | I | F | F | L | I | S | T | G | L | P | I | N | L | L | T | L | L | V | T | F | K | H | K | L | R | Q | P | L | N | Y | I | L | V | N | L | A | V | A | D | L | F | M | A | C | F | G |   |
| cormorant         | LAEP | W  | K  | Y  | R  | L  | V | C | C | Y | I | F | F | L | I | S | T | G | L | P | I | N | L | L | T | L | L | V | T | F | K | H | K | L | R | Q | P | L | N | Y | I | L | V | N | L | A | V | A | D | L | L | M | A | C | F | G |   |
| turtleCpic        | LAEP | W  | K  | Y  | R  | I  | V | C | C | Y | I | F | F | L | I | F | T | G | L | P | I | N | L | L | T | L | L | V | T | F | K | H | K | L | R | Q | P | L | N | Y | I | L | V | N | L | A | V | A | D | L | F | M | A | C | F | G |   |
| turtlePsin        | LAEP | W  | K  | Y  | R  | I  | V | C | C | Y | I | F | F | L | I | F | T | G | L | P | I | N | L | L | T | L | L | V | T | F | K | H | K | L | R | Q | P | L | N | Y | I | L | V | N | L | A | V | A | D | L | F | M | A | C | F | G |   |
| goldcrest         | LAEP | W  | K  | Y  | R  | L  | V | C | C | Y | I | F | F | L | I | S | T | G | F | P | I | N | F | L | T | L | L | V | T | F | K | H | K | L | R | Q | P | L | N | Y | I | L | V | N | L | A | V | A | D | L | C | M | A | C | F | G |   |
| hummingbird       | LAEP | W  | K  | Y  | R  | L  | V | C | C | Y | I | F | F | L | I | S | T | G | L | P | I | N | L | L | T | L | L | V | T | F | K | H | K | L | R | Q | P | L | N | Y | I | L | V | N | L | A | V | A | D | L | F | M | A | C | F | G |   |

**Fig. S1.** Aligned amino acid sequences of RH2 pigments. (A) Present-day pigments, where Bkillifish, scabbard, and Ital lizard are bluefin killifish, scabbardfish, and Italian lizard, respectively. The numbers after P in parentheses show  $\lambda_{\max}$ s. Amino acids sites 122, 207, and 292 are indicated by stars (\*). (B) 13 ancestral pigments inferred by applying the PAML with JTT model to the 24 sequence data, where the ancestral amino acids with  $< PP$  of 95% or less are indicated by bold italic letters. The amino acids in red letters are those of chameleon (P495). Following the tradition in vision science, the amino acid site numbers are those of bovine rhodopsin (GenBank accession no. M21606).

(Fig. S1A, continued)

|                   | 100      | 110    | 120 *  | 130   | 140    | 150  |
|-------------------|----------|--------|--------|-------|--------|------|
| lamprey (P492)    | FTTTFYTA | MNGYFV | FGPTGC | NI    | EGFFAT | LGG  |
| shark-Cmil        | FVLSFY   | TMNGY  | FIFG   | PIGCI | FE     | GGQ  |
| eel (P506)        | FTITFY   | TAINGY | FVFG   | PVGC  | AVEG   | FMAT |
| goldfish1 (P511)  | FTVTFY   | TAINGY | FVFG   | PVGC  | AVEG   | FMAT |
| goldfish2 (P506)  | FTVTFY   | TAINGY | FVFG   | PVGC  | AVEG   | FMAT |
| zebrafish1 (P467) | FTVSFY   | CSLVG  | YMAL   | GLPL  | GC     | VM   |
| zebrafish2 (P478) | FTVTFY   | CSINGY | MALG   | PTGCA | IEG    | FFAT |
| zebrafish3 (P488) | FTVTFY   | TAINGY | FVFG   | PVGC  | AVEG   | FMAT |
| zebrafish4 (P505) | FTVTFY   | TAINGY | FVFG   | PVGC  | AVEG   | FMAT |
| medakaA (P452)    | FTVCIY   | SCMVG  | YFSL   | GPLG  | CTIE   | G    |
| medakaB (P516)    | FTITIT   | TSSFY  | GYFV   | LGP   | TFCA   | IEG  |
| medakaC (P492)    | FTITLN   | SSFY   | GYFV   | LGP   | TFRA   | VEG  |
| Bkillifish (P530) | FTITIT   | SAVNGY | FILG   | PTFC  | GIEG   | FMAT |
| tilapiaAa (P528)  | FTITIT   | SAVNGY | FILG   | PTFC  | GIEG   | FMAT |
| tilapiaAb (P518)  | FTITIT   | SAINGY | FVFG   | PTFC  | IEG    | FMAT |
| tilapiaB (P472)   | FTVTIY   | SCLNGY | FVFG   | PLSCA | IEG    | FMAT |
| scabbardA (P496)  | FTGTI    | IITAL  | NGYF   | IFG   | PLGCA  | IEG  |
| scabbardC (P506)  | FTGTI    | IITAL  | NGYF   | IFG   | PLGCA  | IEG  |
| loosejaw          | FTITFI   | SSLN   | GYFV   | FGT   | L      | GCTV |
| lungfish          | FTVTF    | STA    | INGY   | FIFG  | PRGCA  | IEG  |
| coelacanth (P478) | FTVTFY   | SSLNGY | FVFG   | PVGC  | AVEG   | FMAT |
| chameleon (P495)  | FTVTFY   | TAWNGY | FIFG   | PIGCA | IEG    | FFAT |
| gecko (P467)      | FTVTFY   | ASWY   | AYFV   | FGPIG | CAIEG  | FFAT |
| geckoPmad         | FTVTFY   | TSWY   | GYFV   | FGPM  | GCAF   | EG   |
| lizardUsta        | FTVTFY   | TAWNGY | FIFG   | PIGCA | IEG    | FFAT |
| pigeon (P503)     | FTVTFY   | TAWNGY | FVFG   | PVGC  | AVEG   | FMAT |
| zebrafinch (P508) | FTVTFY   | TAWNGY | FVFG   | PIGCA | VEG    | FFAT |
| chicken (P505)    | FTVTFY   | TAWNGY | FVFG   | PVGC  | AVEG   | FMAT |
| budgeriger        | FTVTFY   | TAWNGY | FVFG   | PIGCA | VEG    | FFAT |
| Ital lizard       | FTVTFY   | TAWNGY | FIFG   | PIGCA | IEG    | FFAT |
| bald eagle        | FTVTFY   | TAWNGY | FVFG   | PVGC  | AVEG   | FMAT |
| bee-eater         | FTVTFY   | TAWNGY | FVFG   | PVGC  | AVEG   | FMAT |
| cormorant         | FTVTFY   | TAWNGY | FVFG   | PVGC  | AVEG   | FMAT |
| turtleCpic        | FTVTFY   | TAWNGY | FIFG   | PIGCA | VEG    | FFAT |
| turtlePsin        | FTVTFY   | TAWNGY | FIFG   | PTGCA | VEG    | FFAT |
| goldcrest         | FTVTFY   | TAWNGY | FVFG   | PIGCA | VEG    | FFAT |
| hummingbird       | FTVTFY   | TAWNGY | FVFG   | PIGCA | VEG    | FFAT |

(Fig. S1A, continued)

|                   | 160                     | 170                         | 180                        | 190         | 200     | *210 |
|-------------------|-------------------------|-----------------------------|----------------------------|-------------|---------|------|
| lamprey (P492)    | THAALGVVFTWVMASACAVPPLV | GWWSRYIPEGMQCSCGPDYYTL      | NPKYYNESYVIYLF             | FLV         |         |      |
| shark-Cmil        | SHALMGMGFTWFMALTAAPPLV  | GWWSRFIPEGFQCSC             | TPDFYTTNPLYN               | NDSYLMYLF   | SV      |      |
| eel (P506)        | THAIVGIAFTWIMALSCAAPPL  | FGWSRYMPEGLQCSCGPDYY        | TLNPDYHNESYVI              | YMFVV       |         |      |
| goldfish1 (P511)  | SHAFAGIAFTWVMALACAAPPL  | FGWSRYIPEGMQCSCGPDYY        | TLNPDYHNESYVI              | YMFVC       |         |      |
| goldfish2 (P506)  | THASAGIAFTWVMAMACAAPPL  | VGWWSRYIPEGIQCSCGPDYY       | TLNPEYNNESYV               | LYMFIC      |         |      |
| zebrafish1 (P467) | NHAMAGIAFTWFMACSCAVPPL  | FGWSRYLPEGMQTS              | CGPDYYTLNPEY               | NNESYVMYMF  | SC      |      |
| zebrafish2 (P478) | NHAMAGIAFTWVMASSCAVPL   | FGWSRYIPEGMQTS              | CGPDYYTLNPE                | FNNESYVLY   | MFSC    |      |
| zebrafish3 (P488) | NHAFAGIGFTWIMALSCAAPPL  | VGWWSRYIPEGMQCSCGPDYY       | TLNPDYHNESY                | VLYMFCC     |         |      |
| zebrafish4 (P505) | SHAFAGCAFTWVMAMACAAPPL  | VGWWSRYIPEGMQCSCGPDYY       | TLNPEYNNESY                | VLYMFIC     |         |      |
| medakaA (P452)    | THSAAGCAFTWIMASSCAVPL   | VGWWSRYIPEGIQV              | SCGPDYYTLAP                | GFNNESFV    | MYMFTC  |      |
| medakaB (P516)    | THAGAGVLLTWVMALACAAPPL  | CGWSRYIPEGMQCSCGPDYY        | TLAPGFNNESY                | VIYMFVV     |         |      |
| medakaC (P492)    | THAAAGVLF TWVMALACAAPPL | LGWWSRYIPEGMQCSCGPDYY       | TLAPGFNNESY                | VMYMFVC     |         |      |
| Bkillifish (P530) | THAAAGVLS TWIMALACAAPPL | FGWSRYIPEGMQCSCGPDYY        | TLAPGFNNESY                | VIYMFVV     |         |      |
| tilapiaAa (P528)  | AHAGAGVFF TWVMAMACAAPPL | FGWSRYIPEGMQCSCGPDYY        | TLAPGFNNESY                | VIYMFVV     |         |      |
| tilapiaAb (P518)  | AHAGAGVLF TWIMAMACAAPPL | FGWSRYIPEGMQCSCGPDYY        | TLAPGFNNESY                | VIYMFVV     |         |      |
| tilapiaB (P472)   | THAGVGCAFTWIMAMSCAAPPL  | LGWWSRYIPEGIQV              | SCGPDYYTLAP                | GYNNESY     | VMYMFTC |      |
| scabbardA (P496)  | SHAAAGVIFTWIMAMACAAPPL  | FGWSRYLPEGLQCSCGPDYY        | TNSPGFNNDSY                | I IYMFTC    |         |      |
| scabbardC (P506)  | SHAAAGVIFTWIMAMACAAPPL  | FGWSRYLPEGLQCSCGPDYY        | TNSPGFNNDSY                | I IYMFTC    |         |      |
| loosejaw          | SHAAAGVMFTWIMAFS        | CAAPPLFGWSRFIPEGLQV         | SCGPDYYTLNPT               | YNNESYV     | MYLFTC  |      |
| lungfish          | NHSIIGIVFTWLAALSCAAPPL  | FGWSRYLPEGMQCSCGPDYY        | TMNPDYHNESY                | VLYMFVV     |         |      |
| coelacanth (P478) | SHAIMGIAFTWIMALACAAPPL  | VGWWSRYIPEGLQCSCGPDYY       | TLNPDFHNESY                | VMYLFLV     |         |      |
| chameleon (P495)  | THALMGISFTWFMFSF        | SCAAPPLLGWSRYIPEGMQCSCGPDYY | TLNPDYHNESY                | VLYMFGV     |         |      |
| gecko (P467)      | THAIMGIAFTWFMALACAGPPL  | FGWSRFIPEGMQCSCGPDYY        | TLNPDFHNESY                | VIYMFIV     |         |      |
| geckoPmad         | SHAMMGISFTWFMALCCG      | PPLFGWSRFIPEGMQCSCGPDYY     | TLNPDFHNESY                | VIYLF       | TV      |      |
| lizardUsta        | THALLGIAFTWFMFSF        | SCAAPPLFGWSRYIPEGMQCSCGPDYY | TLNPDYHNESY                | VLYMF       | LI      |      |
| pigeon (P503)     | SHAMMGIAFTWIMAFS        | CAAPPLFGWSRYMPEGMQCSCGPDYY  | THNPDYHNESY                | VLYMFI      | I       |      |
| zebrafinch (P508) | SHALMGIAFTWVMAIS        | CAAPPLFGWSRYIPEGMQCSCGPDYY  | THNPDFHNESY                | VLYMFVI     |         |      |
| chicken (P505)    | THAMMGIAFTWVMAF         | S                           | CAAPPLFGWSRYMPEGMQCSCGPDYY | THNPDYHNESY | VLYMFVI |      |
| budgeriger        | SHAMMGIAFTWVMAF         | S                           | CAAPPLFGWSRYMPEGMQCSCGPDYY | THNPDYHNESY | VLYMFVI |      |
| Ital lizard       | SHALMGIAFTWVMSL         | S                           | CAAPPLFGWSRYIPEGMQCSCGPDYY | TLNPDYHNESY | VVYMFVI |      |
| bald eagle        | THAMMGIAFTWIMAF         | S                           | CAAPPLFGWSRYMPEGMQCSCGPDYY | THNPDYHNESY | VLYMFVI |      |
| bee-eater         | SHAMMGIAFTWVMAF         | S                           | CAAPPLFGWSRYMPEGMQCSCGPDYY | THNPDYHNESY | VLYMF   | LI   |
| cormorant         | THAMMGIAFTWVMAF         | S                           | CAAPPLFGWSRYMPEGMQCSCGPDYY | THNPDYHNESY | VLYMFI  | I    |
| turtleCpic        | THALMGISFTWAMAF         | S                           | CAAPPLFGWSRYIPEGMQCSCGPDYY | TLNPDYHNESY | VVYMF   | MV   |
| turtlePsin        | THALMGISFTWVMAF         | S                           | CAAPPLFGWSRYIPEGMQCSCGPDYY | TLNPDYHNESY | VVYMF   | MG   |
| goldcrest         | SHAMMGIAFTWVMAIS        | CAAPPLFGWSRYIPEGMQCSCGPDYY  | THNPDFHNESY                | VLYMLVI     |         |      |
| hummingbird       | SHAMMGIAFTWVMAF         | S                           | CAAPPLFGWSRYMPEGMQCSCGPDYY | THNPDYHNESY | VLYMFVI |      |

(Fig. S1A, continued)

|                   | 220        | 230          | 240         | 250      | 260       | 270              |
|-------------------|------------|--------------|-------------|----------|-----------|------------------|
| lamprey (P492)    | HFLLPVTTI  | IFFTYGRLICTV | KEAAAQQQES  | SASTQKAE | REVTRMVI  | IIMVVGFLVCWVPYAS |
| shark-Cmil        | HFAFPVTLI  | IFFSYGRLICK  | VKEAAAQQQES | ATTQKAE  | KEVTRMVIL | MVIGFLTAWLPYAS   |
| eel (P506)        | HFFLPVLI   | IFFAYGLVCTV  | KAAAATQQES  | SASTQKAE | KEVTRMVIL | MVLGFMVAWTPYAT   |
| goldfish1 (P511)  | HFILPVAVI  | FFTYGRLVCTV  | KAAAQQQDS   | SASTQKAE | REVTKMVIL | MVFGFLIAWTPYAT   |
| goldfish2 (P506)  | HFILPVTTI  | FFTYGRLVCTV  | KAAAQQQDS   | SASTQKAE | REVTKMVIL | MVLGFLVAWTPYAT   |
| zebrafish1 (P467) | HFCIPVTTI  | FFTYGSLVCTV  | KAAAQQQES   | ESTQKAE  | REVTRMVIL | MVLGFLFAWVPYAS   |
| zebrafish2 (P478) | HFCVPVTTI  | FFTYGSLVCTV  | KAAAQQQES   | ESTQKAE  | REVTRMVIL | MVLGFLVAWVPYAS   |
| zebrafish3 (P488) | HFIFPVTTI  | FFTYGRLVCTV  | KAAAQQQES   | ESTQKAE  | REVTRMVIL | MVLGFLVAWTPYAS   |
| zebrafish4 (P505) | HFILPVTTI  | FFTYGRLVCTV  | KAAAQQQES   | ESTQKAE  | REVTRMVIL | MVLGFLIAWTPYAT   |
| medakaA (P452)    | HFCVPVFTI  | FFTYGSLVMTV  | KAAAQQQDS   | SASTQKAE | KEVTRMCFL | MVLGFLLAWVPYAS   |
| medakaB (P516)    | HFFVPVFLI  | FFTYGSLVLT   | VKAAAQQQDS  | SASTQKAE | KEVTRMCCL | LMVFGFLVAWVPYAS  |
| medakaC (P492)    | HFCIPVFLI  | FFTYGSLVLT   | VKAAAQQQDS  | SASTQKAE | KEVTRMCCL | LMVFGFLVAWVPYAS  |
| Bkillifish (P530) | HFFIPVFLI  | FFTYGSLVMTV  | KAAAQQQDS   | SASTQKAE | KEVTRMCV  | LMVMGFLIAWTPYAT  |
| tilapiaAa (P528)  | HFFVPVFI   | IFFTYGSLVMT  | VKAAAQQQDS  | SASTQKAE | KEVTRMCV  | LMVMGFLVAWTPYAS  |
| tilapiaAb (P518)  | HFFVPVFI   | IFFTYGSLVMT  | VKAAAQQQDS  | SASTQKAE | KEVTRMCV  | LMVMGFLIAWTPYAS  |
| tilapiaB (P472)   | HFCVPVFTI  | FFTYGNLVFT   | VKAAAQQQDS  | SASTQKAE | KEVTRMCIL | MVLGFLFAWTPYAS   |
| scabbardA (P496)  | HFCFPVSVI  | FFTYGSLVLT   | VKAAAQQQES  | SASTQKAE | REVTRMCV  | LMVFGFLLAWTPYAS  |
| scabbardC (P506)  | HFCFPVFI   | FFTYGSLVLT   | VKAAAQQQES  | SASTQKAE | REVTRMCV  | LMVFGFLVAWVPYAS  |
| loosejaw          | HFCIPVTTI  | FFTYGSLVCTV  | KAAAQQQES   | ESTQKAE  | REVTRMVIL | MVMGFLVAWVPYAS   |
| lungfish          | HFFIPVIVI  | FFSYGRLICK   | VKEAAAQQQES | SASTQKAE | REVTRMVIL | MVIGFMTAWTPYAT   |
| coelacanth (P478) | HFLLPITTI  | FFTYGRLICK   | VKEAAAQQQES | SASTQKAE | REVTRMVIL | MVIGFLTAWVPYAS   |
| chameleon (P495)  | HFVIPVVVI  | FFSYGRLICK   | VREAAAQQQES | SASTQKAE | REVTRMVIL | MVLGFLLAWTPYAM   |
| gecko (P467)      | HFTVPMVVI  | FFSYGRLVCK   | VREAAAQQQES | ATTQKAE  | KEVTRMVIL | MVLGFLLAWTPYAA   |
| geckoPmad         | HFLTPMII   | FFSYGRLVCK   | VREAAAQQQES | ATTQKAE  | KEVTRMVIL | MVMGFLVAWTPYAT   |
| lizardUsta        | HFVIPVVI   | FFSYGRLICK   | VREAAAQQQES | SASTQKAE | REVTRMVIL | MVLGFLLAWTPYAV   |
| pigeon (P503)     | HFIIIPVVI  | FFSYGRLICK   | VREAAAQQQES | ATTQKAE  | KEVTRMVIL | MVLGFMLAWTPYAV   |
| zebrafinch (P508) | HFIIIPVVI  | FFSYGRLVCK   | VREAAAQQQES | ATTQKAE  | KEVTRMVIL | MVLGFMLAWTPYAV   |
| chicken (P505)    | HFIIIPVVI  | FFSYGRLICK   | VREAAAQQQES | ATTQKAE  | KEVTRMVIL | MVLGFMLAWTPYAV   |
| budgeriger        | HFIIIPVVI  | FFSYGRLICK   | VREAAAQQQES | ATTQKAE  | REVTRMVIL | MVLGFMLAWTPYAV   |
| Ital lizard       | HFVIPVVVI  | FFSYGRLICK   | VREAAAQQQES | SASTQKAE | KEVTRMVIL | MVLGFMLAWTPYAV   |
| bald eagle        | HFIIIPVVI  | FFSYGRLICK   | VREAAAQQQES | ATTQKAE  | KEVTRMVIL | MVLGFMLAWTPYAV   |
| bee-eater         | HFIIIPVVI  | FFSYGRLICK   | VREAAAQQQES | ATTQKAE  | KEVTRMVIL | MVLGFMLAWTPYAV   |
| cormorant         | HFIIIPVTVI | FFSYGRLICK   | VREAAAQQQES | ATTQKAE  | KEVTRMVIL | MVLGFMLAWTPYAV   |
| turtleCpic        | HFVVPVVVI  | FFSYGRLICK   | VREAAAQQQES | SASTQKAE | REVTRMVIL | MVLGFLMAWTPYAL   |
| turtlePsin        | HFVIPVVI   | FFSYGQLICK   | VREAAAQQQES | SASTQKAE | REVTRMVIL | MVLGFLLAWTPYAV   |
| goldcrest         | HFIIIPVVI  | FFSYGRLVCK   | VREAAAQQQES | ATTQKAE  | KEVTRMVIL | MVLGFMLAWTPYAV   |
| hummingbird       | HFIIIPVVI  | FFSYGRLICK   | VREHALSFLE  | SATTQKAE | KEVTRMVIL | MVLGFMLAWTPYAV   |



(Fig. S1A, continued)

|                   | 280                              | 290 *                 | 300                   | 310        |
|-------------------|----------------------------------|-----------------------|-----------------------|------------|
| Lamprey (P492)    | FAFYLFMNGILFSATAMTVPAFFSKSSVLYNP | IIYVLLNK              |                       |            |
| shark-Cmil        | LSIWIFTHQGAWISPLLMTIPSF          | SKSSVLYNP             | IIYILMNK              |            |
| eel (P506)        | MTGYIFLNKGVAFTPQSMVPAFFSKSS      | SALYNP                | VIYVLLNK              |            |
| goldfish1 (P511)  | VAAWIFFNKGADFSAKFMAIPAFFSKSS     | SALYNP                | VIYVLLNK              |            |
| goldfish2 (P506)  | VAAWIFFNKGAAFSAQFMAIPAFFSKTS     | SALYNP                | VIYVLLNK              |            |
| zebrafish1 (P467) | FAAWIFFNRGAAFSAQAMAIPAFFSKAS     | ALFNPI                | IIYVLLNK              |            |
| zebrafish2 (P478) | FAAWIFFNRGAAFSAQAMAIPAFFSKAS     | ALFNPI                | IIYVLLNK              |            |
| zebrafish3 (P488) | VAAWIFFNKGAAFSAQFMAVPAFFSKSS     | SIFNPI                | IIYVLLNK              |            |
| zebrafish4 (P505) | VAAWIFFNKGAAFSAQFMAVPAFFSKTS     | SALYNP                | VIYVLLNK              |            |
| medakaA (P452)    | YAAWIFFNRGAAFSAMSMAIPSF          | SKSSALFNPI            | IIYILLNK              |            |
| medakaB (P516)    | FAGWIFLNKGASF                    | TAL                   | TASIPAFFAKSSALYN      | NAVIYVLLNK |
| medakaC (P492)    | FAAWIFLNKGASF                    | TAL                   | TASIPAFFAKSSALYN      | NAVIYVLLNK |
| Bkillifish (P530) | FAGWIFLNKGAAFTAL                 | TAALPAFFAKSSALYNP     | VIYVLMNK              |            |
| tilapiaAa (P528)  | FAGWIFLNKGAAFSAL                 | TAALPAFFAKSSALYNP     | VIYVLMNK              |            |
| tilapiaAb (P518)  | FAGWIFLNKGAAFSAL                 | TAAIPAFFAKSSALYNP     | VIYVLMNK              |            |
| tilapiaB (P472)   | FAAWIFFNKGAAFTATAMAIPSF          | SKSSALFNPI            | IIYILMNK              |            |
| scabbardA (P496)  | LTAYIFMNGVAFTPQSMVPAFFAKSS       | ALFNPI                | IIYVLLNK              |            |
| scabbardC (P506)  | LTAYIFMNGVAFTPQSMVPAFFAKSS       | ALFNPI                | IIYVLLNK              |            |
| loosejaw          | FAAYIFFNKGVAFTAQSMVPAFFSKSS      | ALFNPI                | IIYVLMNK              |            |
| lungfish          | VAFWIFMNGAEFGATFMAAPAFFSKSS      | ALYNPI                | IIYVLMNK              |            |
| coelacanth (P478) | AAFWIFCNRGAEF                    | TATLMTVPAFFSKSSCLFNPI | IIYVLLNK              |            |
| chameleon (P495)  | VAFWIFTNKGVD                     | F                     | SATLMSVPAFFSKSSSLYNPI | IIYVLMNK   |
| gecko (P467)      | TAIWIFTNRGAAFSVTFMTIPAFFSKSS     | SIYNPI                | IIYVLLNK              |            |
| geckoPmad         | VACWIFNKGAEFSVTFMTVPAFFSKSS      | CIYNPI                | IIYVLLNK              |            |
| lizardUsta        | VAFWIFTNKGADF                    | SATLMSVPAFFSKSSSLYNPI | IIYVLMNK              |            |
| pigeon (P503)     | VAFWIFTNKGADF                    | TATLMAVPAFFSKSSSLYNPI | IIYVLMNK              |            |
| zebrafinch (P508) | VAFWIFTNKGADF                    | TATLMAVPAFFSKSSSLYNPI | IIYVLMNK              |            |
| chicken (P505)    | VAFWIFTNKGADF                    | TATLMAVPAFFSKSSSLYNPI | IIYVLMNK              |            |
| budgeriger        | VAFWIFTNKGADF                    | SATLMSVPAFFSKSSSLYNP  | VIYVLMNK              |            |
| Ital lizard       | VAFWIFTNKGADF                    | SATLMSVPAFFSKSSSLYNPI | IIYVLMNK              |            |
| bald eagle        | VAFWIFTNKGADF                    | TATLMSVPAFFSKSSSLYNPI | IIYVLMNK              |            |
| bee-eater         | VAFWIFTNKGADF                    | SATLMSVPAFFSKSSSLYNPI | IIYVLMNK              |            |
| cormorant         | VAFWIFTNKGADF                    | TATLMAVPAFFSKSSSLYNPI | IIYFLSLL              |            |
| turtleCpic        | VAFWIFTNKGADF                    | SATLMSVPAFFSKSSSLYNP  | VIYVLMNK              |            |
| turtlePsin        | VAFWIFTNKGADF                    | SATLMSVPAFFSKSSSLYNPI | IIYVLMNK              |            |
| goldcrest         | VAFWIFTNKGADF                    | SATLMAVPAFFSKSSSLYNPI | IIYVLMNK              |            |
| hummingbird       | VAFWIFTNKGADF                    | TATLMSVPAFFSKSSSLYNPI | IIYVLMNK              |            |

(Fig. S1B)

(B)

|                  | 10                       | 20    | 30        | 40             | 50        | 60        |
|------------------|--------------------------|-------|-----------|----------------|-----------|-----------|
| AncAgnatha (24)  | MNGTEGINFYVPLSNKTGLVRS   | PFPEY | PQYYLAEPW | <b>KYS</b> SAL | AAYMFFL   | LIGFPI    |
| (37)             | MNGTEGINFYVPLSNKTGLVRS   | PFPEY | PQYYLAEPW | <b>KYS</b> VL  | SAYMFFL   | LIGFPI    |
| AncJawedFi (24)  | MNGTEGINFYVPLSNKTGLVRS   | PFPEY | PQYYLAEPW | <b>KYS</b> VL  | AAYMFFL   | LIGFPI    |
| (37)             | MNGTEGINFYVPLSNKTGLVRS   | PFPEY | PQYYLAEPW | <b>KYS</b> VL  | SAYMFFL   | CTGFPI    |
| AncTeleost (24)  | MNGTEGINFYVPLSNKTGLVRS   | PFPEY | PQYYLAEPW | QYKLLAV        | YMFFL     | ICFGFPI   |
| (37)             | MNGTEGINFYVPLSNKTGLVRS   | PFPEY | PQYYLAEPW | QYKLLAV        | YMFFL     | ICFGFPI   |
| AncClupeoc (24)  | MNGTEGINFYVPLSNKTGLVRS   | PFPEY | PQYYLAEPW | QFKLLAV        | YMFFL     | ICFGFPI   |
| (37)             | MNGTEGINFYVPLSNKTGLVRS   | PFPEY | PQYYLAEPW | QFKLLAV        | YMFFL     | ICFGFPI   |
| AncCyprin1 (24)  | MNGTEGINFYVPLSNKTGLVRS   | PFPEY | PQYYLAEPW | QFKLLAV        | YMFFL     | ICFGFPI   |
| (37)             | MNGTEGINFYVPLSNKTGLVRS   | PFPEY | PQYYLAEPW | QFKLLAV        | YMFFL     | ICFGFPI   |
| AncCyprin2 (24)  | MNGTEGINFYVPLSNKTGLVRS   | PFPEY | PQYYLAEPW | QFKLLAV        | YMFFL     | ICFGFPI   |
| (37)             | MNGTEGINFYVPLSNKTGLVRS   | PFPEY | PQYYLAEPW | QFKLLAV        | YMFFL     | ICFGFPI   |
| AncEutelo1 (24)  | MNGTEGINFYVPLSNKTGLVRS   | PFPEY | PQYYLAEPW | QFKLLAV        | YMFFL     | ICFGFPI   |
| (37)             | MNGTEGINFYVPLSNKTGLVRS   | PFPEY | PQYYLAEPW | QFKLLAV        | YMFFL     | ICFGFPI   |
| AncEutelo2 (24)  | MNGTEGINFYVPLSNKTGLVRS   | PFPEY | PQYYLADPW | QFKLLAF        | YMFFL     | ICTGFPI   |
| (37)             | MNGTEGINFYVPLSNKTGLVRS   | PFPEY | PQYYLADPW | QFKLLAF        | YMFFL     | ICTGFPI   |
| AncEutelo3 (24)  | MNGTEGINFYVPLSNKTGLVRS   | PFPEY | PQYYLADPW | QFKLLAF        | YMFFL     | ICTGFPI   |
| (37)             | MNGTEGINFYVPLSNKTGLVRS   | PFPEY | PQYYLADPW | QFKLLAF        | YMFFL     | ICTGFPI   |
| AncEutelo4 (24)  | MNGTEGINFYVPLSNKTGLVRS   | PFPEY | PQYYMVDPI | IYKILAF        | YMFFL     | ICTGTP    |
| (37)             | MNGTEGINFYVPLSNKTGLVRS   | PFPEY | PQYYMVDPI | IYKILAF        | YMFFL     | ICTGTP    |
| AncTetrapo (24)  | MNGTEGINFYVPLSNKTGLVRS   | PFPEY | PQYYLAEPW | <b>KYS</b> VL  | CAYMFFL   | LIGFPI    |
| (37)             | MNGTEGINFYVPLSNKTGLVRS   | PFPEY | PQYYLAEPW | <b>KYS</b> VL  | CAYMFFL   | CTGFPI    |
| AncSaurops (24)  | MNGTEGINFYVPLSNKTGLVRS   | PFPEY | PQYYLAEPW | <b>KY</b> VCCY | IFFLI     | STGLPI    |
| (37)             | MNGTEGINFYVPLSNKTGLVRS   | PFPEY | PQYYLAEPW | <b>KY</b> VCCY | IFFLI     | STGLPI    |
| AncSquamata (24) | MNGTEGINFYVPLSNKTGLVRS   | PFPEY | PQYYLAEPW | <b>KY</b> VCCY | IFFLI     | STGLPI    |
| (37)             | MNGTEGINFYVPLSNKTGLVRS   | PFPEY | PQYYLAEPW | <b>KY</b> VCCY | IFFLI     | STGLPI    |
|                  | 70                       | 80    | 90        | 100            | 110       | 120       |
| AncAgnatha (24)  | VTFKHKLRQPLNYILVNLAVADL  | FMVCF | GFTVTFY   | TAMNGYF        | VFGPTGCN  | IEGFFATLG |
| (37)             | VTFKHKLRQPLNYILVNLAVADL  | FMVCF | GFTVTFY   | TAMNGYF        | VFGPTGCN  | IEGFFATLG |
| AncJawedFi (24)  | VTFKHKLRQPLNYILVNLAVADL  | FMVCF | GFTVTFY   | TAMNGYF        | VFGPTGCN  | IEGFFATLG |
| (37)             | VTFKHKLRQPLNYILVNLAVADL  | FMVCF | GFTVTFY   | TAMNGYF        | VFGPTGCN  | IEGFFATLG |
| AncTeleost (24)  | VTAQHKKLRQPLNFILVNLAVAGL | IMVCF | GFTVTFY   | TAINGYF        | VFLGPTGCN | IEGFFATLG |
| (37)             | VTAQHKKLRQPLNFILVNLAVAGL | IMVCF | GFTVTFY   | TAINGYF        | VFLGPTGCN | IEGFFATLG |
| AncClupeoc (24)  | VTAQHKKLRQPLNFILVNLAVAGL | IMVCF | GFTVTFY   | TAINGYF        | VFLGPTGCN | IEGFFATLG |
| (37)             | VTAQHKKLRQPLNFILVNLAVAGL | IMVCF | GFTVTFY   | TAINGYF        | VFLGPTGCN | IEGFFATLG |
| AncCyprin1 (24)  | VTAQHKKLRQPLNFILVNLAVAGL | IMVCF | GFTVTFY   | TAINGYF        | VFLGPTGCN | IEGFFATLG |
| (37)             | VTAQHKKLRQPLNFILVNLAVAGL | IMVCF | GFTVTFY   | TAINGYF        | VFLGPTGCN | IEGFFATLG |
| AncCyprin2 (24)  | VTAQHKKLRQPLNFILVNLAVAGL | IMVCF | GFTVTFY   | TAINGYF        | VFLGPTGCN | IEGFFATLG |
| (37)             | VTAQHKKLRQPLNFILVNLAVAGL | IMVCF | GFTVTFY   | TAINGYF        | VFLGPTGCN | IEGFFATLG |
| AncEutelo1 (24)  | VTAQHKKLRQPLNFILVNLAVAGL | IMVCF | GFTVTFY   | TALNGYF        | VFLGPTGCN | IEGFFATLG |
| (37)             | VTAQHKKLRQPLNFILVNLAVAGL | IMVCF | GFTVTFY   | TALNGYF        | VFLGPTGCN | IEGFFATLG |
| AncEutelo2 (24)  | VTAQNKKLRQPLNFILVNLAVAGL | IMVCF | GFTVTFY   | TALNGYF        | VFLGPTGCN | IEGFFATLG |
| (37)             | VTAQNKKLRQPLNFILVNLAVAGL | IMVCF | GFTVTFY   | TALNGYF        | VFLGPTGCN | IEGFFATLG |
| AncEutelo3 (24)  | VTAQNKKLRQPLNFILVNLAVAGL | IMVCF | GFTVTFY   | TALNGYF        | VFLGPTGCN | IEGFFATLG |
| (37)             | VTAQNKKLRQPLNFILVNLAVAGL | IMVCF | GFTVTFY   | TALNGYF        | VFLGPTGCN | IEGFFATLG |
| AncEutelo4 (24)  | VTAQNKKLRQPLNYILVNLAVAGL | IMCCF | GFTVTFY   | TAVNGYF        | VFLGPTGCN | IEGFFATLG |
| (37)             | VTAQNKKLRQPLNYILVNLAVAGL | IMCCF | GFTVTFY   | TAVNGYF        | VFLGPTGCN | IEGFFATLG |
| AncTetrapo (24)  | VTFKHKLRQPLNYILVNLAVADL  | FMVCF | GFTVTFY   | TAMNGYF        | VFGPTGCN  | IEGFFATLG |
| (37)             | VTFKHKLRQPLNYILVNLAVADL  | FMVCF | GFTVTFY   | TAMNGYF        | VFGPTGCN  | IEGFFATLG |
| AncSaurops (24)  | VTFKHKLRQPLNYILVNLAVADL  | FMACF | GFTVTFY   | TAWNGYF        | VFGPTGCN  | IEGFFATLG |
| (37)             | VTFKHKLRQPLNYILVNLAVADL  | FMACF | GFTVTFY   | TAWNGYF        | VFGPTGCN  | IEGFFATLG |
| AncSquamata (24) | VTFKHKLRQPLNYILVNLAVADL  | FMACF | GFTVTFY   | TAWNGYF        | VFGPTGCN  | IEGFFATLG |
| (37)             | VTFKHKLRQPLNYILVNLAVADL  | FMACF | GFTVTFY   | TAWNGYF        | VFGPTGCN  | IEGFFATLG |

(Fig. S1B, continued)

|                  | 130                                                                                              | 140 | 150 | 160 | 170 | 180 |
|------------------|--------------------------------------------------------------------------------------------------|-----|-----|-----|-----|-----|
| AncAgnatha (24)  | GEVALWSLVVLAIERYIVVCKPMGNFRF <b>AST</b> HAIMGVAFTW <b>IMALACA</b> APPLFGWSRYIP                   |     |     |     |     |     |
| (37)             | GEV <b>SL</b> WSLVVLAIERYIVVCKPMGNFRF <b>GST</b> HAIMGVAFTW <b>VMAL.SCA</b> APPLVGWSRYIP         |     |     |     |     |     |
| AncJawedFi (24)  | GQVALWSLVVLAIERYIVVCKPMGNFRF <b>AST</b> HAIMGIAFTW <b>IMALACA</b> APPLFGWSRYIP                   |     |     |     |     |     |
| (37)             | GQVALWSLVVLAIERYIVVCKPMGNFRF <b>GST</b> HAIMGIAFTW <b>VMAL.SCA</b> APPLVGWSRYIP                  |     |     |     |     |     |
| AncTeleost (24)  | GQVALWSLVVLAIERYIVVCKPMGSFKF <b>TST</b> HAI <b>VG</b> IAFTW <b>IMALS</b> CAAPPLFGWSRYIP          |     |     |     |     |     |
| (37)             | GQVALWSLVVLAIERYIVVCKPMGSFKF <b>SS</b> THAI <b>IV</b> GI AFTW <b>IMALS</b> CAAPPLFGWSRYIP        |     |     |     |     |     |
| AncClupeoc (24)  | GQVALWSLVVLAIERYIVVCKPMGSFKF <b>SS</b> THAI <b>AG</b> IAFTW <b>IMAM</b> SCAAPPLFGWSRYIP          |     |     |     |     |     |
| (37)             | GQVALWSLVVLAIERYIVVCKPMGSFKF <b>SS</b> SHA <b>IAG</b> IAFTW <b>IMAM</b> SCAAPPLFGWSRYIP          |     |     |     |     |     |
| AncCyprin1 (24)  | GQVALWSLVVLAIERYIVVCKPMGSFKF <b>SS</b> SHA <b>IAG</b> IAFTW <b>VMAM</b> SCAAPPLFGWSRYIP          |     |     |     |     |     |
| (37)             | GQVALWSLVVLAIERYIVVCKPMGSFKF <b>SS</b> SHA <b>IAG</b> IAFTW <b>VMAM</b> SCAAPPLFGWSRYIP          |     |     |     |     |     |
| AncCyprin2 (24)  | GEVALWSLVVLAIERYIVVCKPMGSFKF <b>SS</b> SHAFAGIAFTW <b>VMAM</b> ACAAPPLVGWSRYIP                   |     |     |     |     |     |
| (37)             | GEVALWSLVVLAIERYIVVCKPMGSFKF <b>SS</b> SHAFAGIAFTW <b>VMAM</b> ACAAPPLVGWSRYIP                   |     |     |     |     |     |
| AncEutelo1 (24)  | GQVALWSLVVLA <b>I</b> ERYIVVCKPMGSFKF <b>TATH</b> AAAGVAFTW <b>IMAM</b> SCAAPPLFGWSRYIP          |     |     |     |     |     |
| (37)             | GQVALWSLVVLA <b>I</b> ERYIVVCKPMGSFKF <b>GASH</b> AAAGVAFTW <b>IMAM</b> SCAAPPLFGWSRYIP          |     |     |     |     |     |
| AncEutelo2 (24)  | GQVALWSLVVLA <b>I</b> ERYIVVCKPMGSFKF <b>TATH</b> AAAGVAFTW <b>IMAM</b> SCAAPPLFGWSRYIP          |     |     |     |     |     |
| (37)             | GQVALWSLVVLA <b>V</b> ERYIVVCKPMGSFKF <b>TATH</b> AAAGVAFTW <b>IMAM</b> SCAAPPLFGWSRYIP          |     |     |     |     |     |
| AncEutelo3 (24)  | GQVSLWSLVVLA <b>I</b> ERYIVVCKPMGSFKF <b>TATH</b> AAAGCAFTW <b>IMAM</b> SCAAPPL <b>L</b> GWSRYIP |     |     |     |     |     |
| (37)             | GQVSLWSLVVLA <b>V</b> ERYIVVCKPMGSFKF <b>TATH</b> AAAGCAFTW <b>IMAM</b> SCAAPPL <b>L</b> GWSRYIP |     |     |     |     |     |
| AncEutelo4 (24)  | GEVALWSLVVLA <b>V</b> ERYIVVCKPMGSFKF <b>TGTH</b> AAAGVLF <b>TW</b> IMAMACAAPPLFGWSRYIP          |     |     |     |     |     |
| (37)             | GEVALWSLVVLA <b>V</b> ERYIVVCKPMGSFKF <b>TGTH</b> AAAGVLF <b>TW</b> IMAMACAAPPLFGWSRYIP          |     |     |     |     |     |
| AncTetrapo (24)  | GQVALWSLVVLAIERYIVVCKPMGNFRF <b>AST</b> HAIMGIAFTW <b>IMALACA</b> APPLFGWSRYIP                   |     |     |     |     |     |
| (37)             | GQVALWSLVVLAIERYIVVCKPMGNFRF <b>SS</b> THALMGIAFTW <b>VMAF</b> S <b>CA</b> APPLFGWSRYIP          |     |     |     |     |     |
| AncSaurops (24)  | GQVALWSLVVLAIERYIVVCKPMGNFRF <b>SATH</b> ALMGIAFTW <b>VMAF</b> S <b>CA</b> APPLFGWSRYIP          |     |     |     |     |     |
| (37)             | GQVALWSLVVLAIERYIVVCKPMGNFRF <b>SATH</b> ALMGIAFTW <b>VMAF</b> S <b>CA</b> APPLFGWSRYIP          |     |     |     |     |     |
| AncSquamata (24) | GQVALWSLVVLAIERYIVVCKPMGNFRF <b>SATH</b> ALMGIAFTW <b>VMAF</b> S <b>CA</b> APPLFGWSRYIP          |     |     |     |     |     |
| (37)             | GQVALWSLVVLAIERYIVVCKPMGNFRF <b>SATH</b> ALMGIAFTW <b>VMAF</b> S <b>CA</b> APPLFGWSRYIP          |     |     |     |     |     |
|                  | 190                                                                                              | 200 | 210 | 220 | 230 | 240 |
| AncAgnatha (24)  | EGMQCSCGPDYYTLNP <b>KY</b> HNESYV <b>IYMF</b> VVHFL <b>LP</b> VTTIFF <b>TY</b> GRLICTVKEAAAQQQES |     |     |     |     |     |
| (37)             | EGMQCSCGPDYYTLNP <b>KY</b> HNESYV <b>IYMF</b> VVHF <b>VIP</b> VTV <b>IFF</b> SYGRLICTVKEAAAQQQES |     |     |     |     |     |
| AncJawedFi (24)  | EGMQCSCGPDYYTLNP <b>DY</b> HNESYV <b>MYMF</b> VVHFL <b>LP</b> VTTIFF <b>TY</b> GRLICTVKEAAAQQQES |     |     |     |     |     |
| (37)             | EGMQCSCGPDYYTLNP <b>KY</b> HNESYV <b>IYMF</b> VVHF <b>VIP</b> VTV <b>IFF</b> SYGRLICKVKEAAAQQQES |     |     |     |     |     |
| AncTeleost (24)  | EGMQCSCGPDYYTLNP <b>DY</b> HNESYV <b>MYMF</b> VVHF <b>FL</b> PVTTIFF <b>TY</b> GLVCTVKAAAAQQQES  |     |     |     |     |     |
| (37)             | EGMQCSCGPDYYTLNP <b>DY</b> HNESYV <b>IYMF</b> VVHF <b>FIP</b> VTTIFF <b>TY</b> GLVCTVKAAAAQQQES  |     |     |     |     |     |
| AncClupeoc (24)  | EGMQCSCGPDYYTLNP <b>DY</b> NNESYV <b>MYMF</b> VCHFC <b>LP</b> VTTIFF <b>TY</b> GLVCTVKAAAAQQQES  |     |     |     |     |     |
| (37)             | EGMQCSCGPDYYTLNP <b>EY</b> NNESYV <b>IYMF</b> VCHFC <b>IP</b> VTTIFF <b>TY</b> GLVCTVKAAAAQQQES  |     |     |     |     |     |
| AncCyprin1 (24)  | EGMQCSCGPDYYTLNP <b>EY</b> NNESYV <b>LYMF</b> ICHFC <b>LP</b> VTTIFF <b>TY</b> GLVCTVKAAAAQQQES  |     |     |     |     |     |
| (37)             | EGMQCSCGPDYYTLNP <b>EY</b> NNESYV <b>LYMF</b> ICHFC <b>IP</b> VTTIFF <b>TY</b> GLVCTVKAAAAQQQES  |     |     |     |     |     |
| AncCyprin2 (24)  | EGMQCSCGPDYYTLNP <b>EY</b> NNESYV <b>LYMF</b> ICHFILPVTTIFF <b>TY</b> GRLVCTVKAAAAQQQES          |     |     |     |     |     |
| (37)             | EGMQCSCGPDYYTLNP <b>EY</b> NNESYV <b>LYMF</b> ICHFILPVTTIFF <b>TY</b> GRLVCTVKAAAAQQQES          |     |     |     |     |     |
| AncEutelo1 (24)  | EGMQCSCGPDYYTLNP <b>G</b> YNNESYV <b>MYMF</b> TCHFC <b>LP</b> VTTIFF <b>TY</b> GLVCTVKAAAAQQQES  |     |     |     |     |     |
| (37)             | EGMQCSCGPDYYTLNP <b>G</b> YNNESYV <b>MYMF</b> TCHFC <b>IP</b> VTTIFF <b>TY</b> GLVCTVKAAAAQQQES  |     |     |     |     |     |
| AncEutelo2 (24)  | EGMQCSCGPDYYTLAP <b>G</b> YNNESYV <b>MYMF</b> TCHFC <b>VP</b> VTTIFF <b>TY</b> GLVMTVKAAAAQQQDS  |     |     |     |     |     |
| (37)             | EGMQCSCGPDYYTLAP <b>G</b> YNNESYV <b>MYMF</b> TCHFC <b>VP</b> VTTIFF <b>TY</b> GLVMTVKAAAAQQQDS  |     |     |     |     |     |
| AncEutelo3 (24)  | EGIQVSCGPDYYTLAP <b>G</b> YNNESYV <b>MYMF</b> TCHFC <b>VP</b> VTTIFF <b>TY</b> GLVMTVKAAAAQQQDS  |     |     |     |     |     |
| (37)             | EGIQVSCGPDYYTLAP <b>G</b> YNNESYV <b>MYMF</b> TCHFC <b>VP</b> VTTIFF <b>TY</b> GLVMTVKAAAAQQQDS  |     |     |     |     |     |
| AncEutelo4 (24)  | EGMQCSCGPDYYTLAP <b>G</b> YNNESYV <b>IYMF</b> VVHFF <b>VP</b> VTTIFF <b>TY</b> GLVMTVKAAAAQQQDS  |     |     |     |     |     |
| (37)             | EGMQCSCGPDYYTLAP <b>G</b> YNNESYV <b>IYMF</b> VVHFF <b>VP</b> VTTIFF <b>TY</b> GLVMTVKAAAAQQQDS  |     |     |     |     |     |
| AncTetrapo (24)  | EGMQCSCGPDYYTLNP <b>DY</b> HNESYV <b>MYMF</b> VVHFL <b>LP</b> VTTIFF <b>TY</b> GRLICKVKEAAAQQQES |     |     |     |     |     |
| (37)             | EGMQCSCGPDYYTLNP <b>DY</b> HNESYV <b>IYMF</b> VVHF <b>VIP</b> VTV <b>IFF</b> SYGRLICKVKEAAAQQQES |     |     |     |     |     |
| AncSaurops (24)  | EGMQCSCGPDYYTLNP <b>DY</b> HNESYV <b>LYMF</b> VVHFIIPVV <b>IFF</b> SYGRLICKVREAAAQQQES           |     |     |     |     |     |
| (37)             | EGMQCSCGPDYYTLNP <b>DY</b> HNESYV <b>LYMF</b> VVHFIIPVV <b>IFF</b> SYGRLICKVREAAAQQQES           |     |     |     |     |     |
| AncSquamata (24) | EGMQCSCGPDYYTLNP <b>DY</b> HNESYV <b>LYMF</b> VVHFIIPVV <b>IFF</b> SYGRLICKVREAAAQQQES           |     |     |     |     |     |
| (37)             | EGMQCSCGPDYYTLNP <b>DY</b> HNESYV <b>LYMF</b> VVHFIIPVV <b>IFF</b> SYGRLICKVREAAAQQQES           |     |     |     |     |     |

(Fig. S1B, continued)

|                 | 250             | 260              | 270      | 280     | 290               | 300 |
|-----------------|-----------------|------------------|----------|---------|-------------------|-----|
| AncAgnatha (24) | ASTQKAEKEVTRMVI | IMVIGFLVCWVPYAS  | VAFYIF   | TNKGADF | SATLMTVPAFFSKSSAL |     |
| (37)            | ASTQKAEKEVTRMVI | IMVIGFLVCWVPYAS  | VAFYIF   | TNKGADF | SATLMTVPAFFSKSSAL |     |
| AncJawedFi (24) | ASTQKAEKEVTRMVI | ILMVLGFLVAWVPYAS | VAFWIF   | TNKGADF | TATLMTVPAFFSKSSAL |     |
| (37)            | ASTQKAEKEVTRMVI | ILMVLGFLVAWVPYAS | VAFWIF   | TNKGADF | SATLMTVPAFFSKSSAL |     |
| AncTeleost (24) | ASTQKAEKEVTRMVI | ILMVLGFLVAWTPYAS | SVAAWIF  | FNKGAAF | TAQSMVPAFFSKSSAL  |     |
| (37)            | ASTQKAEKEVTRMVI | ILMVLGFLVAWTPYAS | SVAAWIF  | FNKGAAF | SAQSMVPAFFSKSSAL  |     |
| AncClupeoc (24) | ASTQKAEKEVTRMVI | ILMVLGFLVAWTPYAS | SFAAWIFF | FNKGAAF | TAQSMVPAFFSKSSAL  |     |
| (37)            | ASTQKAEKEVTRMVI | ILMVLGFLVAWTPYAS | SFAAWIFF | FNKGAAF | SAQSMVPAFFSKSSAL  |     |
| AncCyprin1 (24) | ESTQKAEKEVTRMVI | ILMVLGFLVAWTPYAS | SFAAWIFF | FNKGAAF | SAQSMVPAFFSKSSAL  |     |
| (37)            | ESTQKAEKEVTRMVI | ILMVLGFLVAWTPYAS | SFAAWIFF | FNKGAAF | SAQSMVPAFFSKSSAL  |     |
| AncCyprin2 (24) | ESTQKAEKEVTRMVI | ILMVLGFLVAWTPYAS | TVAAWIFF | FNKGAAF | SAQSMVPAFFSKSSAL  |     |
| (37)            | ESTQKAEKEVTRMVI | ILMVLGFLVAWTPYAS | TVAAWIFF | FNKGAAF | SAQSMVPAFFSKSSAL  |     |
| AncEutelo1 (24) | ASTQKAEKEVTRMVI | ILMVLGFLVAWTPYAS | SFAAWIFF | FNKGAAF | TAQSMVPAFFSKSSAL  |     |
| (37)            | ASTQKAEKEVTRMVI | ILMVLGFLVAWTPYAS | SFAAWIFF | FNKGAAF | TAQSMVPAFFSKSSAL  |     |
| AncEutelo2 (24) | ASTQKAEKEVTRMVI | ILMVLGFLVAWTPYAS | SFAAWIFF | FNKGAAF | TAMSMAIPAFFSKSSAL |     |
| (37)            | ASTQKAEKEVTRMVI | ILMVLGFLVAWTPYAS | SFAAWIFF | FNKGAAF | TAMSMAIPAFFSKSSAL |     |
| AncEutelo3 (24) | ASTQKAEKEVTRMVI | ILMVLGFLVAWTPYAS | SFAAWIFF | FNKGAAF | TAMSMAIPAFFSKSSAL |     |
| (37)            | ASTQKAEKEVTRMVI | ILMVLGFLVAWTPYAS | SFAAWIFF | FNKGAAF | TAMSMAIPAFFSKSSAL |     |
| AncEutelo4 (24) | ASTQKAEKEVTRMVI | ILMVLGFLVAWTPYAS | SFAAWIFF | FNKGAAF | TALTAAPAFFSKSSAL  |     |
| (37)            | ASTQKAEKEVTRMVI | ILMVLGFLVAWTPYAS | SFAAWIFF | FNKGAAF | TALTAAPAFFSKSSAL  |     |
| AncTetrapo (24) | ASTQKAEKEVTRMVI | ILMVLGFLVAWVPYAS | VAFWIF   | TNKGADF | TATLMTVPAFFSKSSAL |     |
| (37)            | ASTQKAEKEVTRMVI | ILMVLGFLVAWVPYAS | VAFWIF   | TNKGADF | SATLMTVPAFFSKSSAL |     |
| AncSaurops (24) | ASTQKAEKEVTRMVI | ILMVLGFLVAWTPYAS | VAFWIF   | TNKGADF | TATLMTVPAFFSKSSAL |     |
| (37)            | ASTQKAEKEVTRMVI | ILMVLGFLVAWTPYAS | VAFWIF   | TNKGADF | SATLMTVPAFFSKSSAL |     |
| AncSquam (24)   | ASTQKAEKEVTRMVI | ILMVLGFLVAWTPYAS | VAFWIF   | TNKGADF | SATLMTVPAFFSKSSAL |     |
| (37)            | ASTQKAEKEVTRMVI | ILMVLGFLVAWTPYAS | VAFWIF   | TNKGADF | SATLMTVPAFFSKSSAL |     |

|                 | 310              | 320   | 330       | 340     | 350               |
|-----------------|------------------|-------|-----------|---------|-------------------|
| AncAgnatha (24) | YNPIIYVLLNKQFRNC | MITTC | CGKNPFGDE | DVSSSVS | QSKTEVSSVSSSQVSPA |
| (37)            | YNPIIYVLLNKQFRNC | MITTC | CGKNPFGDE | DVSSSVS | QSKTEVSSVSSSQVSPA |
| AncActino (24)  | YNPIIYVLLNKQFRNC | MITTC | CGKNPFGDE | DVSSSVS | QSKTEVSSVSSSQVSPA |
| (37)            | YNPIIYVLLNKQFRNC | MITTC | CGKNPFGDE | DVSSSVS | QSKTEVSSVSSSQVSPA |
| AncTeleost (24) | YNPIIYVLLNKQFRNC | MITTC | CGKNPFGDE | DVSSSVS | QSKTEVSSVSSSQVSPA |
| (37)            | YNPIIYVLLNKQFRNC | MITTC | CGKNPFGDE | DVSSSVS | QSKTEVSSVSSSQVSPA |
| AncClupeoc (24) | YNPIIYVLLNKQFRNC | MITTC | CGKNPFGDE | DVSSSVS | QSKTEVSSVSSSQVSPA |
| (37)            | YNPIIYVLLNKQFRNC | MITTC | CGKNPFGDE | DVSSSVS | QSKTEVSSVSSSQVSPA |
| AncCyprin1 (24) | YNPIIYVLLNKQFRNC | MITTC | CGKNPFGDE | DVSSSVS | QSKTEVSSVSSSQVSPA |
| (37)            | YNPIIYVLLNKQFRNC | MITTC | CGKNPFGDE | DVSSSVS | QSKTEVSSVSSSQVSPA |
| AncCyprin2 (24) | YNPIIYVLLNKQFRNC | MITTC | CGKNPFGDE | DVSSSVS | QSKTEVSSVSSSQVSPA |
| (37)            | YNPIIYVLLNKQFRNC | MITTC | CGKNPFGDE | DVSSSVS | QSKTEVSSVSSSQVSPA |
| AncEutelo1 (24) | FNPIIYVLLNKQFRNC | MITTC | CGKNPFGDE | DVSSSVS | QSKTEVSSVSSSQVSPA |
| (37)            | FNPIIYVLLNKQFRNC | MITTC | CGKNPFGDE | DVSSSVS | QSKTEVSSVSSSQVSPA |
| AncEutelo2 (24) | FNPIIYVLLNKQFRNC | MITTC | CGKNPFGDE | DVSSSVS | QSKTEVSSVSSSQVSPA |
| (37)            | FNPIIYVLLNKQFRNC | MITTC | CGKNPFGDE | DVSSSVS | QSKTEVSSVSSSQVSPA |
| AncEutelo3 (24) | FNPIIYVLLNKQFRNC | MITTC | CGKNPFGDE | DVSSSVS | QSKTEVSSVSSSQVSPA |
| (37)            | FNPIIYVLLNKQFRNC | MITTC | CGKNPFGDE | DVSSSVS | QSKTEVSSVSSSQVSPA |
| AncEutelo4 (24) | YNPIIYVLLNKQFRNC | MITTC | CGKNPFGDE | DVSSSVS | QSKTEVSSVSSSQVSPA |
| (37)            | YNPIIYVLLNKQFRNC | MITTC | CGKNPFGDE | DVSSSVS | QSKTEVSSVSSSQVSPA |
| AncTetrapo (24) | YNPIIYVLLNKQFRNC | MITTC | CGKNPFGDE | DVSSSVS | QSKTEVSSVSSSQVSPA |
| (37)            | YNPIIYVLLNKQFRNC | MITTC | CGKNPFGDE | DVSSSVS | QSKTEVSSVSSSQVSPA |
| AncSaurops (24) | YNPIIYVLLNKQFRNC | MITTC | CGKNPFGDE | DVSSSVS | QSKTEVSSVSSSQVSPA |
| (37)            | YNPIIYVLLNKQFRNC | MITTC | CGKNPFGDE | DVSSSVS | QSKTEVSSVSSSQVSPA |
| AncSquam (24)   | YNPIIYVLLNKQFRNC | MITTC | CGKNPFGDE | DVSSSVS | QSKTEVSSVSSSQVSPA |
| (37)            | YNPIIYVLLNKQFRNC | MITTC | CGKNPFGDE | DVSSSVS | QSKTEVSSVSSSQVSPA |

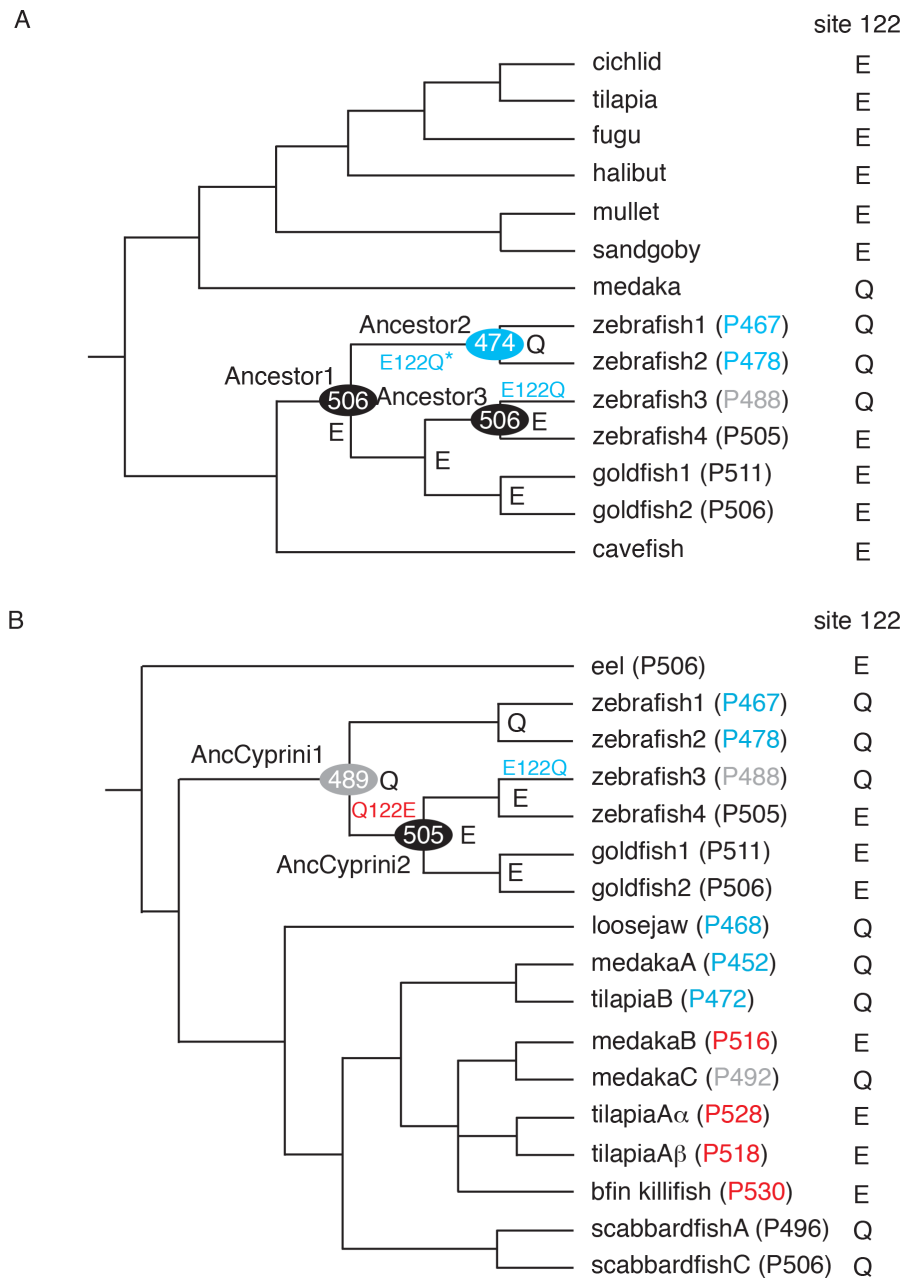

**Fig. S2.** Two different inferences of the RH2 pigment evolution in Cypriniformes. The AncCyprini1 was inferred to have either E122 (**A**, Chinen et al. 2005) or Q122 (**B**, present analysis). The  $\lambda_{\max}$ S of Ancestors 1-3 are taken from (Chinen et al. 2005). The numbers in ovals and after P in rectangles show  $\lambda_{\max}$ S of the ancestral and present-day pigments, respectively. The amino acids at site 122 are given at the right column. E122Q decreases the  $\lambda_{\max}$ , whereas Q122E increases  $\lambda_{\max}$ . E122Q\* explains about 47% of the  $\lambda_{\max}$ -shift of Ancestor2. Blue, grey, black, and red indicates the  $\lambda_{\max}$ S of 452-478 nm, 488-492 nm, 495-511 nm, and 516-530 nm, respectively.

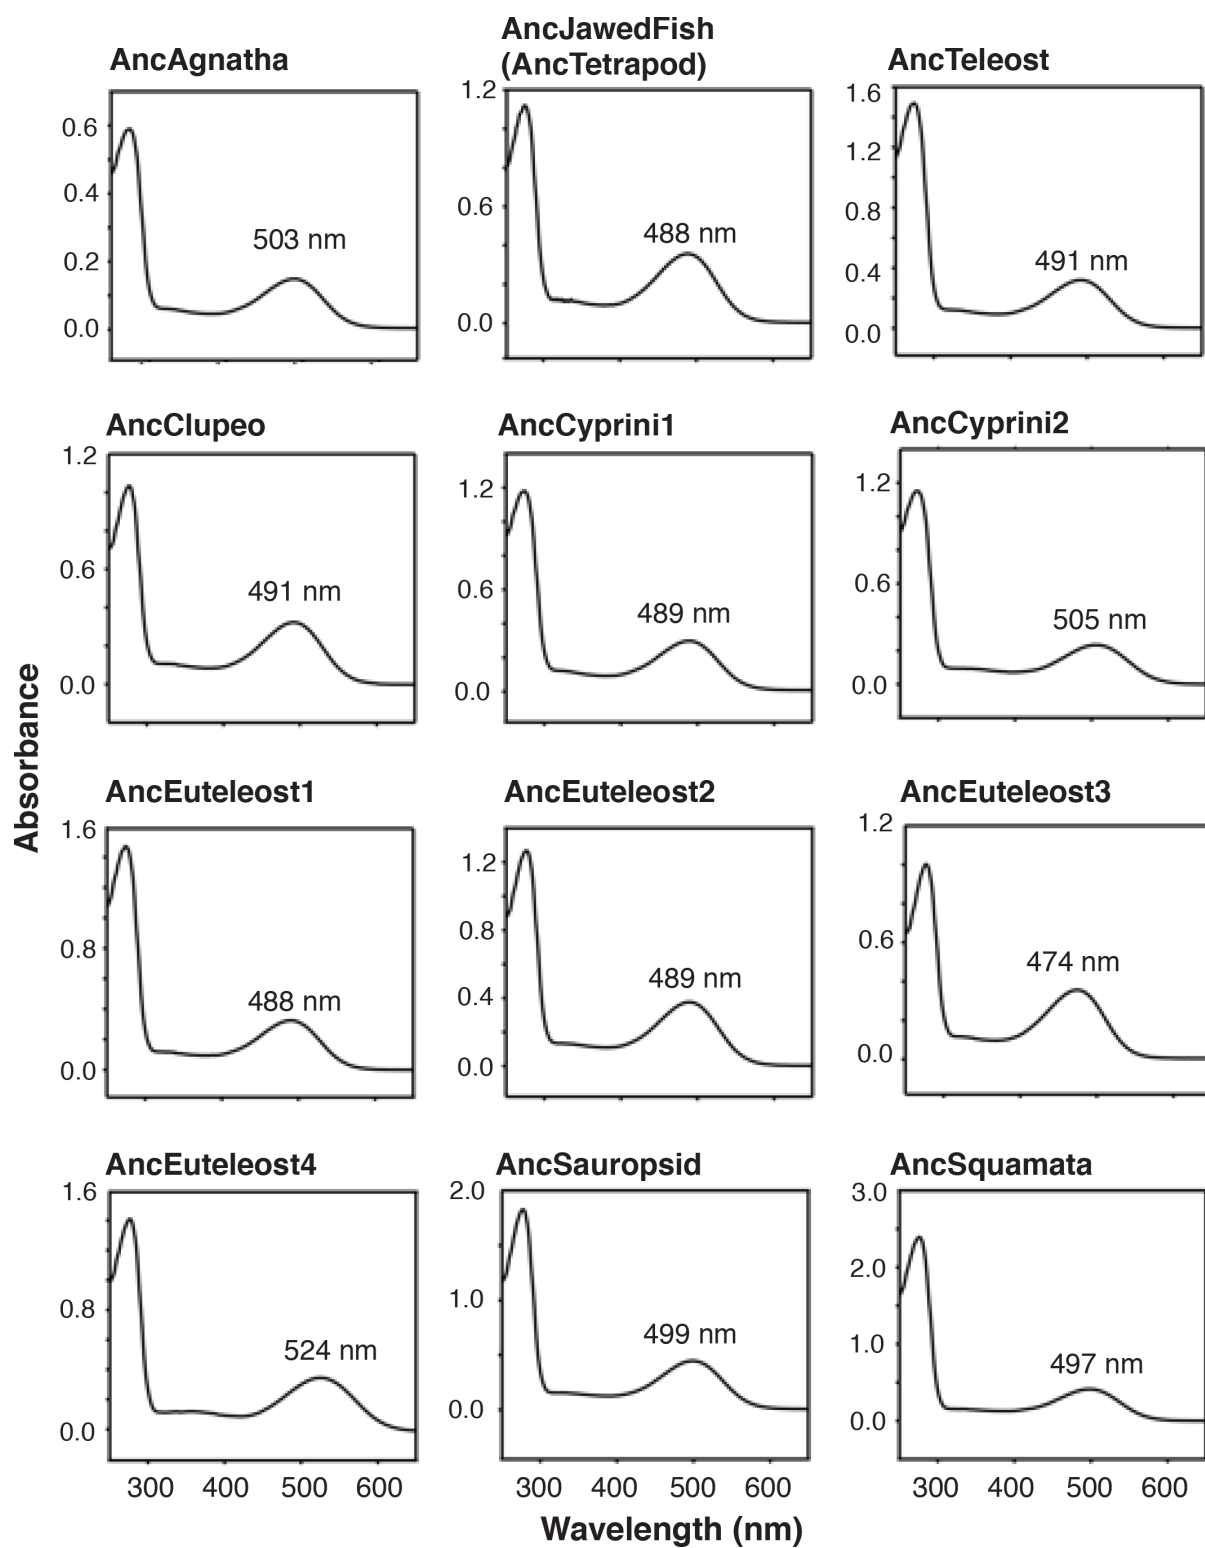

**Fig. S3.** Absorption spectra of ancestral RH2 pigments. The  $\lambda_{max}$  values of AncJawedFish and AncTetrapod are identical at 488 nm but their absorbance levels at ~280 nm are 1.1 and 1.6, respectively.
